# Supplementary material for: Suicidal Behavior During Lithium and Valproate Treatment: A Within-Individual 8-Year Prospective Study of 50,000 Patients With Bipolar Disorder
Source: Atypon-hosted journal article supplement (doi:10.1176/appi.ajp.2017.16050542), 2017-06-09
Supplement: appi.ajp.2017.16050542.ds001.pdf [file appi.ajp.2017.16050542.ds001.pdf]

 


Psychiatry Online
